# Supplementary material
Source: PubMed Central journal article supplement (PMC3491087)
Supplement: NIHMS378266-supplement-1_si_001.pdf [file NIHMS378266-supplement-1_si_001.pdf]

## Supporting Information

# Single-Molecule Spectroscopic Study of Dynamic Nanoscale DNA Bending Behavior of HIV-1 Nucleocapsid Protein

Hui Wang <sup>\*, ‡, §</sup>, Karin Musier-Forsyth,<sup>||</sup> Caroline Falk,<sup>§</sup> and Paul F. Barbara<sup>§, ¶</sup>

<sup>‡</sup> *Department of Chemistry and Biochemistry, University of South Carolina, Columbia, SC 29208*

<sup>||</sup> *Department of Chemistry and Biochemistry, Center for RNA Biology, and Center for Retrovirus  
Research, Ohio State University, Columbus, OH 43210*

<sup>§</sup> *Center for Nano and Molecular Science and Technology, The University of Texas, Austin, TX 78712*

<sup>¶</sup> Passed away on October 31, 2010.

\* *Corresponding author. Email: [wang344@mailbox.sc.edu](mailto:wang344@mailbox.sc.edu); Phone: 803-777-2203; FAX: 803-777-9521.*

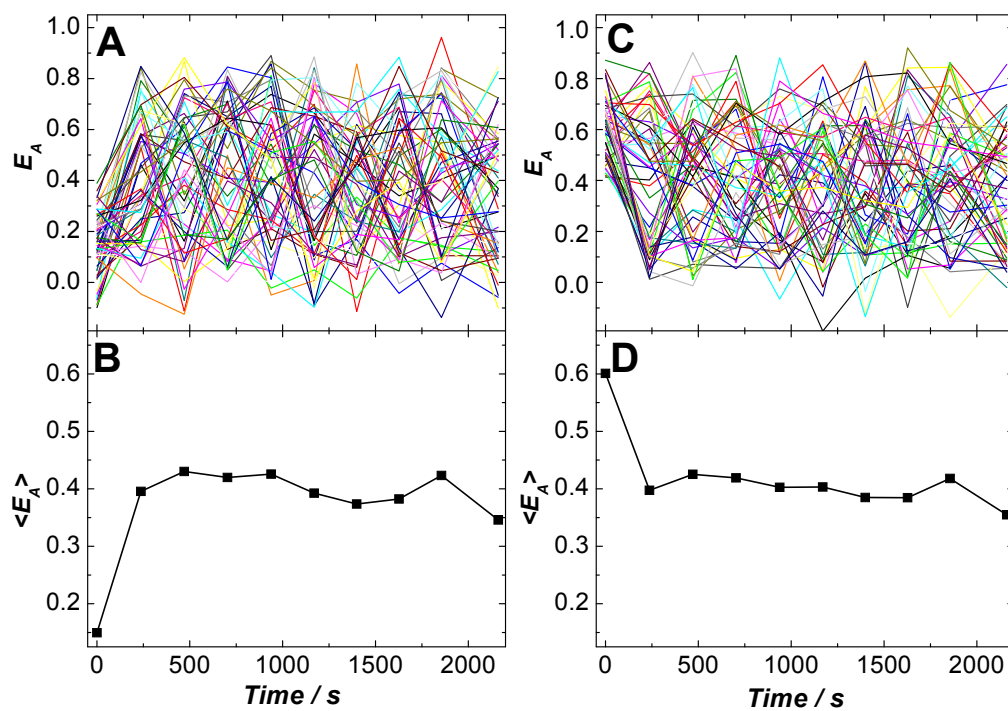

**Figure S1.** “Hole-burning” analysis of the FRET trajectories (obtained in image scanning mode) of 120 TAR-cTAR DNA duplex molecules in 2  $\mu$ M NC. Panels A and C show the  $E_A$  trajectories of a sub-ensemble composed of 60 molecules with initial  $E_A$  values smaller than 0.4 and a sub-ensemble composed of 60 molecules with initial  $E_A$  values larger than 0.4, respectively. The corresponding molecular-averaged  $E_A$  trajectories of the two sub-ensembles are shown in Panels B and D.

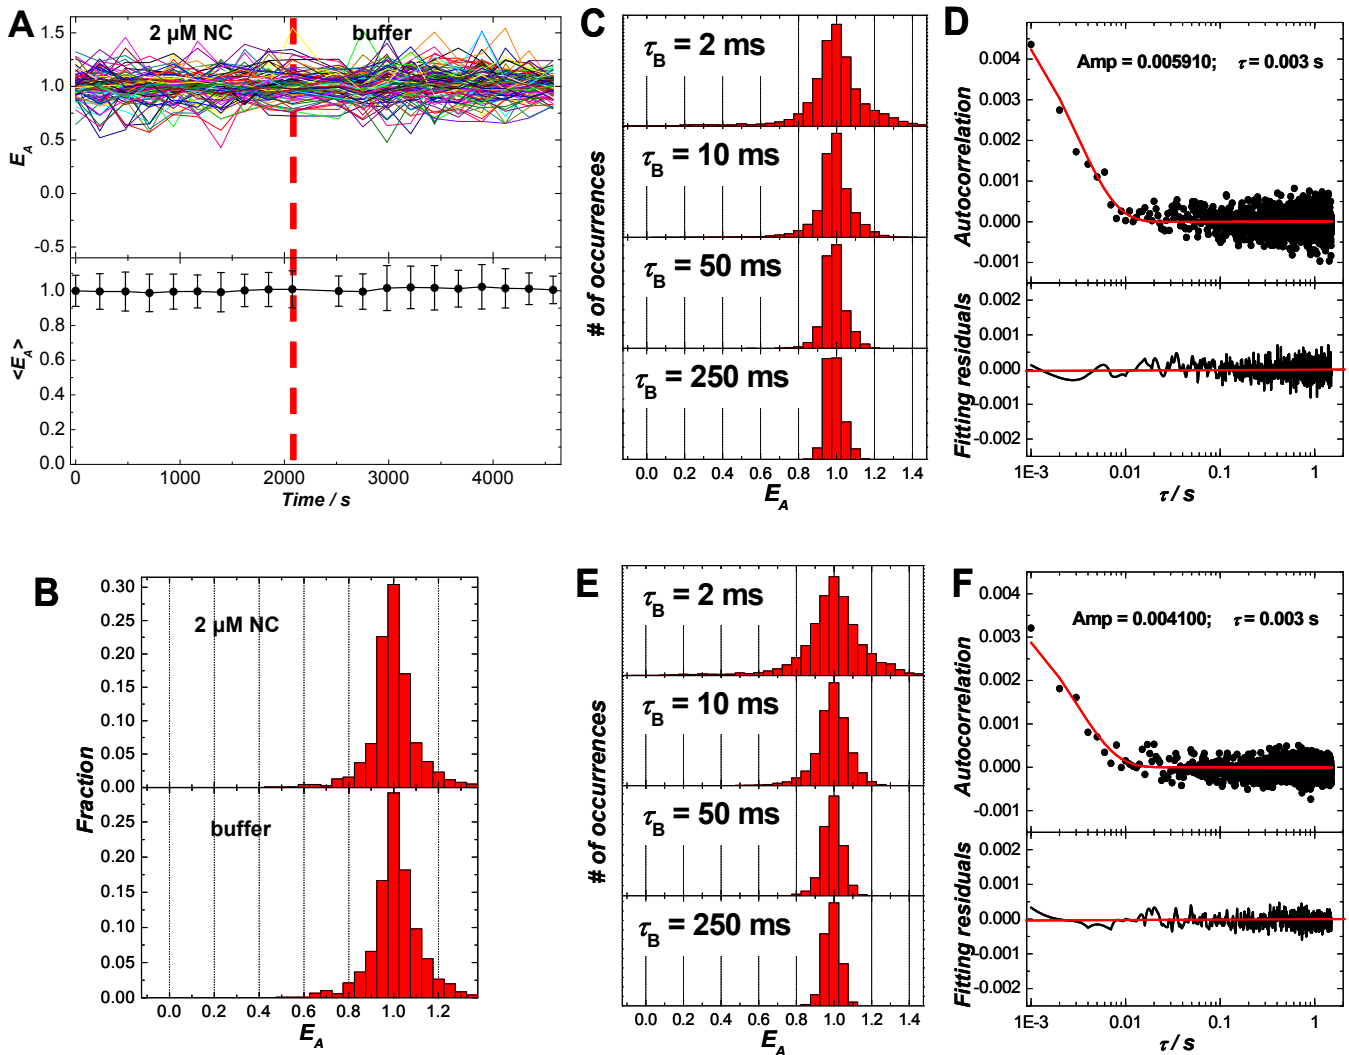

**Figure S2.** FRET fluctuations of fully duplexed TAR-cTAR with Cy3 and Cy5 at the same end of the DNA duplex. (A) Single-molecule FRET trajectories (obtained in the image scanning mode) of 157 molecules found in a  $30 \mu\text{m} \times 30 \mu\text{m}$  region and the corresponding molecularly-averaged FRET trajectory. The dual dye-labeled DNA duplexes were formed through NC-chaperoned annealing between the Cy3-TAR and 3'-Cy5-cTAR DNA oligonucleotides. The duplexed DNA molecules were immobilized on a coverslip and were exposed to  $2 \mu\text{M}$  NC and buffer during time periods I and II, respectively. (B) FRET histograms of all spectroscopic occurrences of the DNA duplex molecules in  $2 \mu\text{M}$  NC (*upper panel*) and buffer (*lower panel*). (C) The ensemble FRET histograms (obtained in the individual trajectory mode) constructed from FRET trajectories of 50 molecules in  $2 \mu\text{M}$  NC with a bin time  $\tau_B$  of 2 ms, 10 ms, 50 ms, and 250 ms. (D) The ensemble FRET autocorrelation obtained from FRET trajectories of the 50 molecules in  $2 \mu\text{M}$  NC. (E) The ensemble FRET histograms obtained from FRET trajectories of 50 molecules in buffer with a bin time  $\tau_B$  of 2 ms, 10 ms, 50 ms, and 250 ms. (F) The ensemble FRET autocorrelation obtained from FRET trajectories of the 50 molecules in buffer.

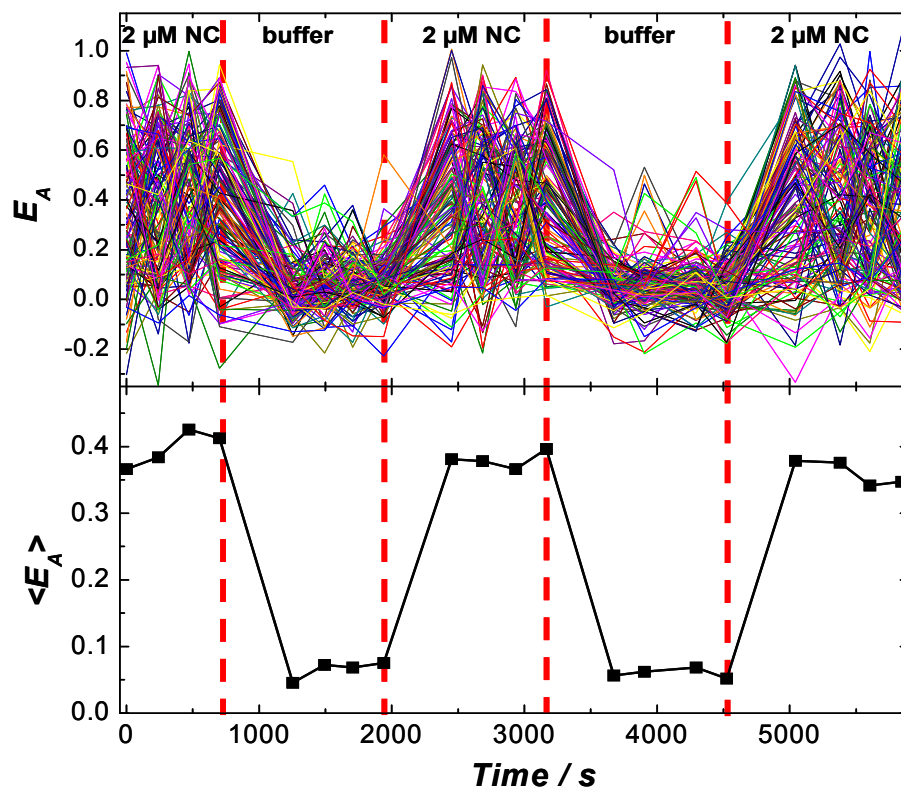

**Figure S3.** Conformational dynamics of TAR-cTAR DNA duplexes during multiple cycles of switching between 2  $\mu\text{M}$  NC and buffer. Single-molecule FRET trajectories (obtained in the image scanning mode) of 142 molecules found in a 30  $\mu\text{m}$  X 30  $\mu\text{m}$  region (*upper panel*) and the corresponding molecularly-averaged FRET trajectory (*lower panel*).

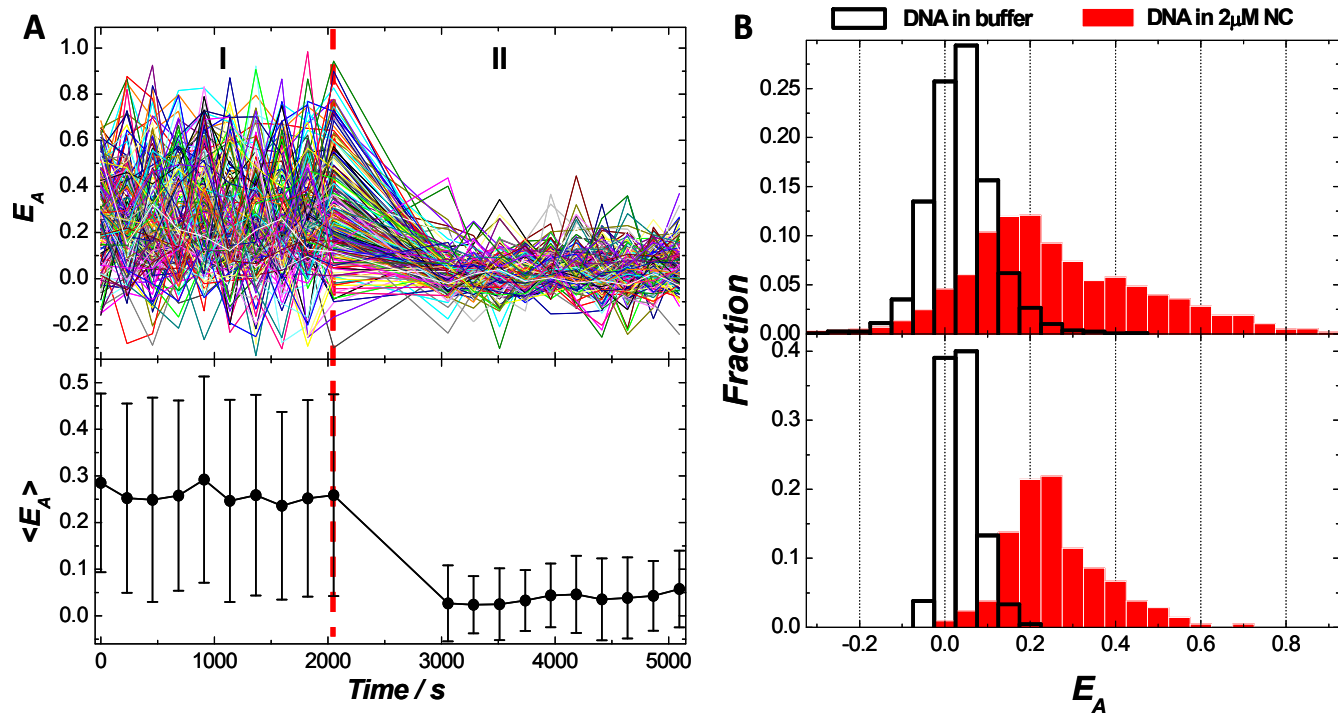

**Figure S4.** Conformational dynamics of a 59-bp fully duplexed DNA segment corresponding to the transcripts of the SL3-SL4  $\psi$  recognition element region of HIV-1 genome in the presence and absence of NC on time scale of minutes. (A) Single-molecule FRET trajectories (obtained in the image scanning mode) of 210 molecules found in a  $30 \mu\text{m} \times 30 \mu\text{m}$  region and the corresponding molecularly-averaged FRET trajectory. The dual dye-labeled DNA duplexes were immobilized on a coverslip. During time periods I and II,  $2 \mu\text{M}$  NC and buffer were flowed into the reaction chamber, respectively. (B) FRET histograms of all spectroscopic occurrences (*upper panel*) and time-averaged FRET (*lower panel*) of the DNA duplex molecules in  $2 \mu\text{M}$  NC and buffer.

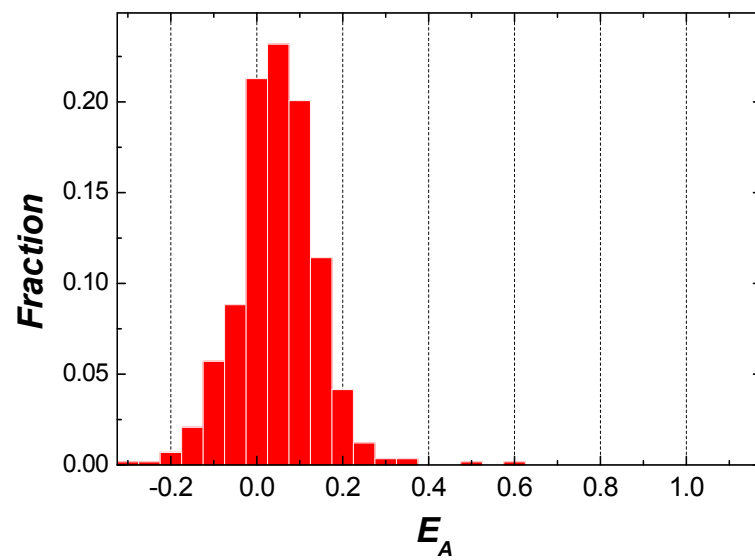

**Figure S5.** FRET histograms (obtained in the image scanning mode) of TAR-cTAR duplexes in 2  $\mu$ M NC and 40 mM  $\text{MgCl}_2$ .

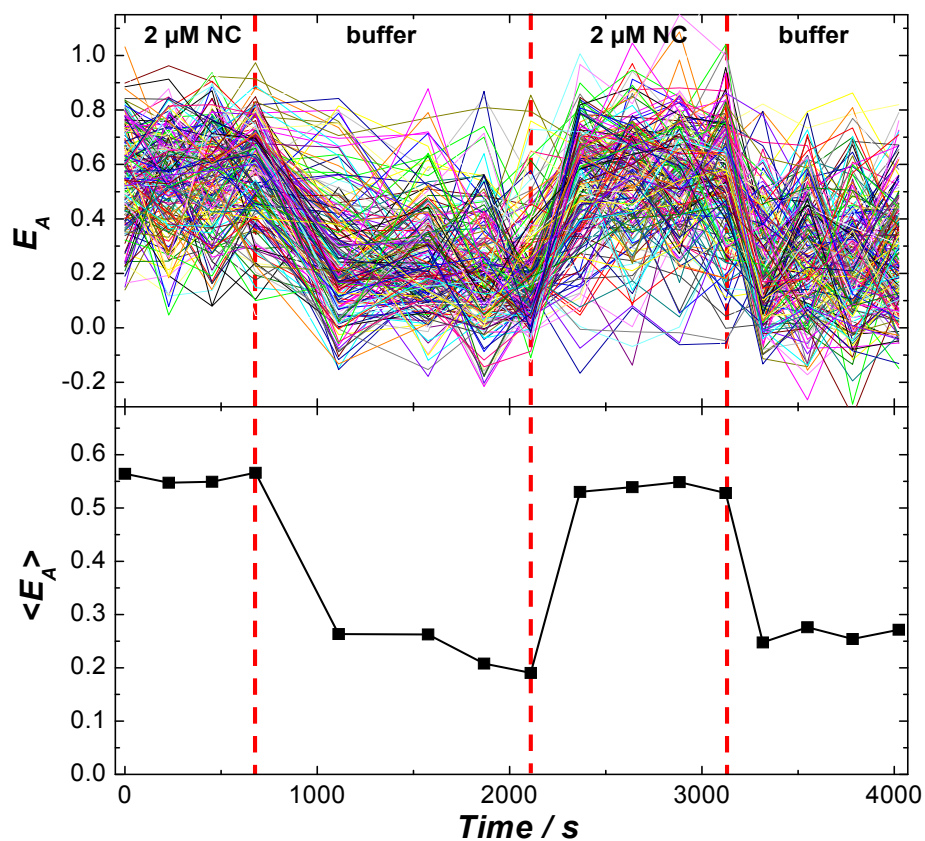

**Figure S6.** Conformational dynamics of TAR-cTAR DNA mismatch1 duplexes during multiple cycles of switching between 2  $\mu\text{M}$  NC and buffer. Single-molecule FRET trajectories (obtained in the image scanning mode) of 209 molecules found in a 30  $\mu\text{m}$  X 30  $\mu\text{m}$  region (*upper panel*) and the corresponding molecularly-averaged FRET trajectory (*lower panel*).

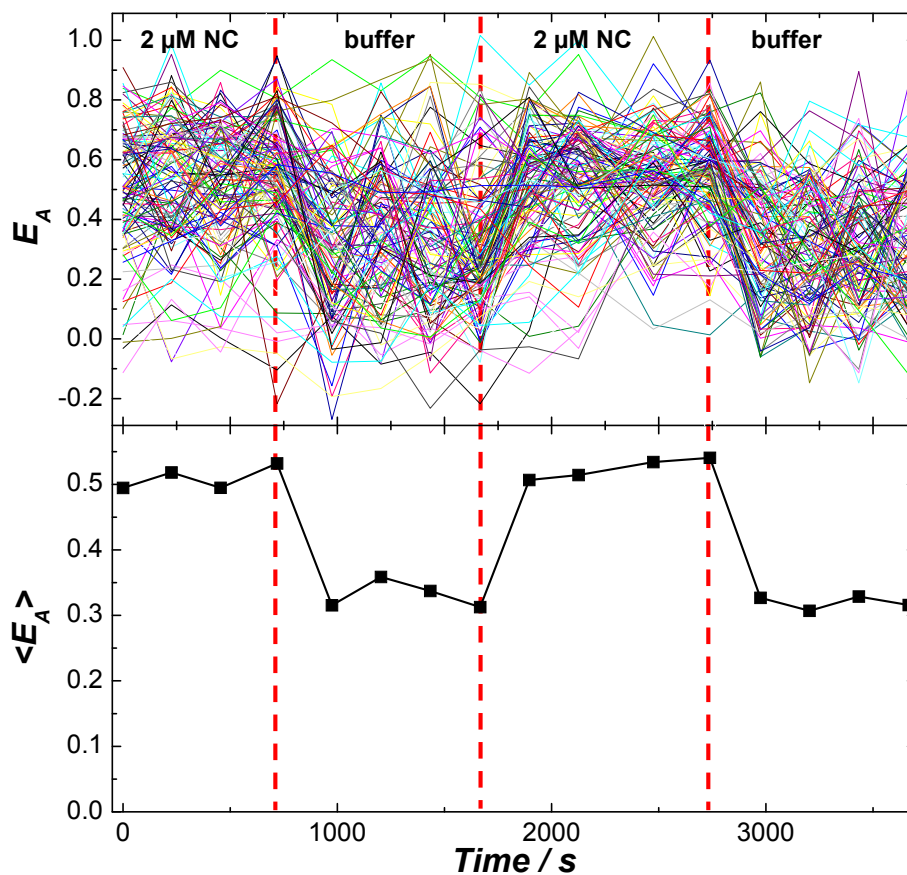

**Figure S7.** Conformational dynamics of TAR-cTAR DNA mismatch2 duplexes during multiple cycles of switching between 2  $\mu\text{M}$  NC and buffer. Single-molecule FRET trajectories (obtained in the image scanning mode) of 125 molecules found in a 30  $\mu\text{m}$  X 30  $\mu\text{m}$  region (*upper panel*) and the corresponding molecularly-averaged FRET trajectory (*lower panel*).



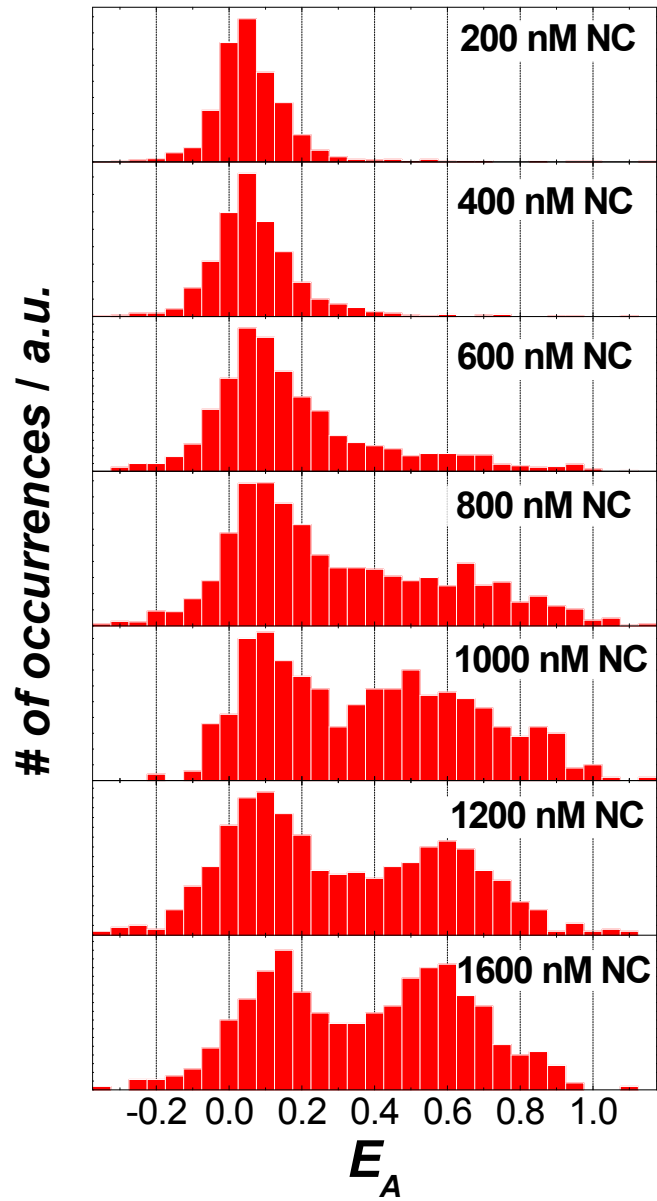

**Figure S8.** FRET histograms (obtained in the image scanning mode) of the TAR-cTAR DNA duplexes in the presence of NC at different concentrations.
